# Supplementary material
Source: bioRxiv or medRxiv preprint supplement (https://www.biorxiv.org/highwire/filestream/69036/field_highwire_adjunct_files/8/216754-17.pdf)
Supplement: Supplementary file [file 216754-17.pdf]

|                                                              |          |          |          |          |          |          |   |          |          |          |          |          |          |          |          |          |          |
|--------------------------------------------------------------|----------|----------|----------|----------|----------|----------|---|----------|----------|----------|----------|----------|----------|----------|----------|----------|----------|
| REACTOME_INTERFERON_SIGNALING                                | 1.96E-16 | 1        | 9.92E-18 | 6.60E-12 | 7.03E-13 | 5.52E-28 | 1 | 1        | 1.86E-22 | 4.04E-07 | 7.07E-07 | 2.68E-10 | 4.60E-12 | 1.30E-28 | 8.99E-25 | 12       | 9.27E-08 |
| TAKEDA_TARGETS_OF_NUP98_HOXA9_FUSION_3D_UP                   | 9.34E-40 | 1        | 3.27E-29 | 1.68E-33 | 8.88E-03 | 1.80E-51 | 1 | 4.42E-04 | 2.29E-40 | 1.31E-08 | 2.21E-13 | 2.13E-24 | 1        | 9.33E-60 | 2.71E-37 | 12       | 7.77E-04 |
| TAKEDA_TARGETS_OF_NUP98_HOXA9_FUSION_10D_UP                  | 4.13E-39 | 1        | 1.68E-26 | 4.46E-28 | 1.29E-02 | 7.31E-42 | 1 | 6.46E-04 | 5.69E-34 | 2.20E-08 | 1.24E-15 | 5.38E-24 | 1        | 6.98E-42 | 1.29E-36 | 12       | 1.13E-03 |
| DEBIASI_APOPTOSIS_BY_REOVIRUS_INFECTION_UP                   | 1.05E-14 | 1        | 1.58E-13 | 4.76E-18 | 1.82E-06 | 1.25E-18 | 1 | 1.09E-02 | 3.25E-18 | 1        | 4.61E-09 | 5.21E-14 | 3.71E-02 | 2.58E-24 | 5.84E-16 | 12       | 4.00E-03 |
| BOSCO_INTERFERON_INDUCED_ANTIVIRAL_MODULE                    | 7.29E-31 | 1        | 5.39E-20 | 1.52E-27 | 1.41E-10 | 1.82E-25 | 1 | 2.38E-08 | 1.32E-21 | 2.50E-09 | 2.52E-11 | 6.96E-21 | 1        | 2.23E-35 | 1.99E-25 | 12       | 2.21E-09 |
| HECKER_IFNB1_TARGETS                                         | 1.18E-49 | 1        | 7.83E-38 | 4.92E-34 | 8.85E-10 | 1.17E-49 | 1 | 9.13E-10 | 3.27E-37 | 6.53E-11 | 8.07E-22 | 1.07E-31 | 1        | 7.73E-71 | 3.68E-47 | 12       | 1.55E-10 |
| GSE13485_DAY7_VS_DAY21_YF17D_VACCINE_PBMC_UP                 | 3.24E-26 | 1        | 3.07E-26 | 2.99E-23 | 6.62E-04 | 1.46E-33 | 1 | 7.73E-04 | 7.60E-26 | 2.03E-06 | 5.25E-13 | 1.26E-18 | 1        | 9.89E-56 | 4.11E-25 | 12       | 1.20E-04 |
| GSE14000_UNSTIM_VS_16H_LPS_DC_TRANSLATED_RNA_DN              | 3.43E-13 | 1        | 1.22E-12 | 6.76E-11 | 1.54E-02 | 1.97E-19 | 1 | 1        | 1.04E-18 | 2.81E-08 | 2.83E-06 | 1.92E-07 | 7.88E-05 | 1.44E-22 | 3.31E-13 | 12       | 1.29E-03 |
| GSE1432_CTRL_VS_IFNG_6H_MICROGLIA_DN                         | 1.58E-07 | 4.64E-11 | 6.96E-11 | 2.87E-07 | 1.49E-28 | 3.42E-13 | 1 | 9.84E-11 | 2.78E-08 | 1.20E-04 | 1        | 1        | 5.93E-27 | 6.25E-17 | 6.12E-08 | 12       | 1.01E-05 |
| GSE17974_IL4_AND_ANTI_IL12_VS_UNTREATED_24H_ACT_CD4_TCELL_DN | 4.77E-31 | 1        | 3.83E-20 | 4.77E-21 | 1.54E-02 | 4.76E-31 | 1 | 7.73E-04 | 2.23E-28 | 2.03E-06 | 1.21E-10 | 1.26E-18 | 1        | 2.96E-39 | 2.93E-27 | 12       | 1.34E-03 |
| GSE24634_IL4_VS_CTRL_TREATED_NAIVE_CD4_TCELL_DAYS_DN         | 3.43E-13 | 2.16E-07 | 2.68E-16 | 8.22E-17 | 1.15E-11 | 2.73E-17 | 1 | 1        | 5.15E-21 | 1.20E-04 | 1        | 1.72E-09 | 9.73E-08 | 9.05E-19 | 4.54E-15 | 12       | 1.00E-05 |
| GSE2706_UNSTIM_VS_2H_LPS_AND_R848_DC_DN                      | 3.29E-15 | 1        | 6.96E-11 | 6.76E-11 | 6.62E-04 | 3.08E-11 | 1 | 1.88E-05 | 3.21E-10 | 1        | 2.12E-08 | 1.24E-11 | 2.96E-06 | 2.23E-13 | 4.54E-15 | 12       | 5.70E-05 |
| GSE34205_HEALTHY_VS_FLU_INF_INFANT_PBMC_DN                   | 6.81E-24 | 1        | 2.35E-28 | 6.69E-19 | 6.62E-04 | 1.34E-28 | 1 | 7.77E-04 | 2.23E-28 | 1.20E-04 | 1.21E-10 | 1.26E-18 | 1        | 4.81E-37 | 5.19E-23 | 12       | 1.30E-04 |
| 15735721-SuppTable1b                                         | 2.84E-26 | 1        | 2.07E-20 | 1.55E-16 | 1.79E-06 | 2.50E-39 | 1 | 1        | 3.14E-28 | 1        | 8.37E-12 | 8.24E-18 | 5.89E-06 | 1.32E-50 | 2.51E-23 | 11       | 6.98E-07 |
| REACTOME_INTERFERON_ALPHA_BETA_SIGNALING                     | 7.11E-19 | 1        | 3.26E-21 | 5.00E-16 | 2.34E-09 | 1.44E-29 | 1 | 1        | 1.62E-25 | 1        | 2.66E-09 | 1.44E-13 | 6.18E-07 | 3.23E-32 | 7.35E-27 | 11       | 5.66E-08 |
| DER_IFN_ALPHA_RESPONSE_UP                                    | 1.07E-15 | 1        | 4.99E-18 | 3.43E-20 | 3.10E-19 | 1.26E-20 | 1 | 1        | 2.89E-19 | 1        | 6.56E-09 | 4.90E-13 | 3.22E-16 | 4.17E-26 | 1.33E-18 | 11       | 5.97E-10 |
| DER_IFN_BETA_RESPONSE_UP                                     | 1.67E-16 | 1        | 2.99E-16 | 9.22E-21 | 2.68E-17 | 3.04E-21 | 1 | 1        | 4.05E-20 | 1        | 4.74E-08 | 7.06E-12 | 1.90E-14 | 6.99E-26 | 5.23E-19 | 11       | 4.31E-09 |
| SANA_IFN_SIGNALING_UP                                        | 7.19E-13 | 1        | 4.11E-07 | 7.92E-15 | 2.70E-12 | 1.22E-10 | 1 | 3.87E-06 | 2.11E-11 | 1        | 1        | 8.15E-08 | 4.00E-06 | 1.54E-18 | 5.83E-18 | 11       | 7.61E-07 |
| HELLER_SILENCED_BY_METHYLATION_UP                            | 1.56E-11 | 3.89E-03 | 3.30E-06 | 1.58E-04 | 1        | 2.56E-15 | 1 | 1        | 1.17E-12 | 1        | 2.23E-05 | 2.73E-08 | 2.85E-06 | 1.15E-14 | 1.31E-06 | 11       | 3.71E-04 |
| MOSERLE_IFNA_RESPONSE                                        | 1.58E-45 | 1        | 7.10E-29 | 1.07E-34 | 1        | 5.02E-42 | 1 | 6.21E-14 | 1.22E-33 | 4.37E-15 | 2.54E-14 | 1.49E-22 | 1        | 1.51E-42 | 8.54E-39 | 11       | 8.35E-15 |
| GSE1432_1H_VS_6H_IFNG_MICROGLIA_DN                           | 1.58E-07 | 1.15E-05 | 5.98E-06 | 2.87E-07 | 1.20E-20 | 1.58E-07 | 1 | 6.63E-09 | 1.19E-04 | 1        | 1        | 1        | 2.02E-19 | 5.21E-10 | 9.85E-05 | 11       | 2.14E-05 |
| GSE18791_CTRL_VS_NEWCASTLE_VIRUS_DC_12H_DN                   | 1.98E-19 | 1        | 1.22E-12 | 8.30E-13 | 6.29E-17 | 1.97E-19 | 1 | 9.84E-11 | 3.11E-12 | 1        | 1        | 1.72E-09 | 7.41E-11 | 1.60E-26 | 5.54E-17 | 11       | 1.73E-10 |
| GSE2706_R848_VS_R848_AND_LPS_2H_STIM_DC_DN                   | 3.09E-11 | 1.15E-05 | 3.50E-09 | 2.87E-07 | 1.54E-02 | 3.28E-15 | 1 | 1        | 2.55E-14 | 1        | 1        | 1.92E-07 | 1.82E-03 | 3.92E-15 | 6.12E-08 | 11       | 1.56E-03 |
| GSE3982_CTRL_VS_LPS_48H_DC_DN                                | 3.43E-13 | 5.13E-04 | 1.91E-14 | 4.76E-09 | 1        | 1.24E-21 | 1 | 1        | 1.76E-16 | 2.03E-06 | 1.21E-10 | 1.24E-11 | 1        | 9.05E-19 | 4.54E-15 | 11       | 4.68E-05 |
| 15735721-Table3                                              | 1.40E-18 | 1        | 5.45E-16 | 1.13E-13 | 1        | 6.68E-26 | 1 | 1        | 7.42E-20 | 1        | 2.47E-10 | 1.05E-11 | 9.21E-04 | 2.62E-32 | 1.46E-16 | 10       | 9.21E-05 |
| 19014521-Table6b                                             | 8.92E-05 | 1.12E-04 | 2.68E-10 | 4.69E-10 | 3.10E-11 | 2.03E-08 | 1 | 1        | 3.34E-07 | 1        | 1        | 1        | 1.70E-10 | 7.76E-08 | 1.25E-12 | 10       | 2.02E-05 |
| 16818636-TableS3                                             | 1.16E-21 | 1        | 1.29E-17 | 2.23E-13 | 1        | 7.84E-33 | 1 | 1        | 3.76E-26 | 3.40E-06 | 1.54E-08 | 2.76E-13 | 1        | 2.25E-28 | 2.65E-20 | 10       | 3.42E-07 |
| TAKEDA_TARGETS_OF_NUP98_HOXA9_FUSION_8D_UP                   | 4.41E-28 | 1        | 5.45E-24 | 3.24E-18 | 1        | 2.92E-41 | 1 | 1        | 5.54E-33 | 3.70E-07 | 1.69E-11 | 2.20E-17 | 1        | 1.49E-37 | 4.34E-27 | 10       | 3.70E-08 |
| GRAESSMANN_RESPONSE_TO_MC_AND_SERUM_DEPRIVATION_UP           | 4.27E-19 | 1        | 1.26E-10 | 1.70E-14 | 9.54E-04 | 5.56E-17 | 1 | 1        | 2.11E-18 | 1        | 3.91E-06 | 1.24E-13 | 1        | 4.87E-26 | 3.89E-11 | 10       | 9.58E-05 |
| SEITZ_NEOPLASTIC_TRANSFORMATION_BY_SP_DELETION_UP            | 6.59E-26 | 1        | 4.19E-18 | 8.65E-23 | 1        | 2.24E-31 | 1 | 1        | 1.68E-27 | 2.66E-07 | 1.56E-11 | 1.06E-15 | 1        | 4.89E-31 | 1.93E-23 | 10       | 2.66E-08 |
| RADAeva_RESPONSE_TO_IFNA1_UP                                 | 5.82E-20 | 1        | 1.26E-17 | 1.42E-19 | 4.05E-10 | 3.18E-28 | 1 | 1        | 6.32E-24 | 1        | 1.71E-15 | 2.46E-14 | 1        | 6.59E-29 | 3.83E-18 | 10       | 4.05E-11 |
| JISON_SICKLE_CELL_DISEASE_UP                                 | 9.67E-10 | 1        | 1.29E-09 | 1.93E-09 | 3.34E-04 | 9.65E-10 | 1 | 1        | 1.25E-08 | 1        | 1        | 9.36E-06 | 3.60E-05 | 1.73E-10 | 7.07E-12 | 10       | 3.80E-05 |
| LTE2_UP_V1_DN                                                | 8.41E-22 | 1        | 2.52E-20 | 5.24E-11 | 1.33E-02 | 2.88E-31 | 1 | 1        | 1.46E-23 | 1        | 1.77E-08 | 9.22E-19 | 1        | 2.46E-37 | 3.89E-21 | 10       | 1.33E-03 |
| GSE1432_1H_VS_24H_IFNG_MICROGLIA_DN                          | 4.08E-04 | 5.42E-13 | 1.98E-04 | 1.47E-05 | 1.61E-26 | 4.08E-04 | 1 | 9.84E-11 | 1        | 1        | 1        | 4.07E-23 | 7.65E-07 | 3.09E-03 | 10       | 4.12E-04 |          |
| GSE18791_CTRL_VS_NEWCASTLE_VIRUS_DC_14H_DN                   | 3.43E-13 | 1        | 6.96E-11 | 8.30E-13 | 2.43E-05 | 3.28E-15 | 1 | 1        | 2.55E-14 | 1        | 1        | 1.72E-09 | 1.82E-03 | 9.05E-19 | 3.31E-13 | 10       | 1.85E-04 |
| GSE24634_IL4_VS_CTRL_TREATED_NAIVE_CD4_TCELL_DAY3_DN         | 1        | 3.43E-09 | 1.98E-04 | 1.47E-05 | 9.11E-19 | 1.58E-07 | 1 | 6.63E-09 | 1.19E-04 | 1        | 1        | 1        | 3.69E-14 | 5.21E-10 | 3.09E-03 | 10       | 3.42E-04 |
| GSE2706_2H_VS_8H_R848_STIM_DC_DN                             | 3.43E-13 | 1        | 5.98E-06 | 6.76E-11 | 7.71E-07 | 1.58E-07 | 1 | 7.77E-04 | 2.78E-08 | 1        | 1        | 1.92E-07 | 1        | 1.19E-20 | 1.22E-09 | 10       | 7.80E-05 |
| GSE6269_HEALTHY_VS_FLU_INF_PBMC_DN                           | 1.39E-18 | 1        | 3.64E-28 | 4.18E-18 | 1        | 5.53E-33 | 1 | 1        | 4.22E-30 | 3.16E-05 | 1.73E-16 | 2.72E-17 | 1        | 4.33E-35 | 1.01E-24 | 10       | 3.16E-06 |
